# Supplementary material for: Generation of Lasso Peptide-Based ClpP Binders
Source: MDPI journal article supplement (doi:10.3390/ijms23010465), 2021-12-31
Supplement: s1 [file s1]

# SUPPORTING INFORMATION

## Generation of Lasso Peptide-based ClpP Binders

Imran T. Malik,<sup>1</sup> Julian D. Hegemann,<sup>2,\*</sup> and Heike Brötz-Oesterhelt<sup>1,3,\*</sup>

<sup>1</sup> Department of Microbial Bioactive Compounds, Interfaculty Institute of Microbiology and Infection Medicine, University of Tübingen, Auf der Morgenstelle 28, 72076 Tübingen, Germany.

<sup>2</sup> Helmholtz Institute for Pharmaceutical Research Saarland (HIPS), Helmholtz Centre for Infection Research (HZI), Saarland University Campus, 66123 Saarbrücken, Germany.

<sup>3</sup> Cluster of excellence "Controlling Microbes to Fight Infection"

\* Correspondence: jdhegemann@googlemail.com (J. D. H.); heike.broetz-oesterhelt@uni-tuebingen.de (H. B.-O.)

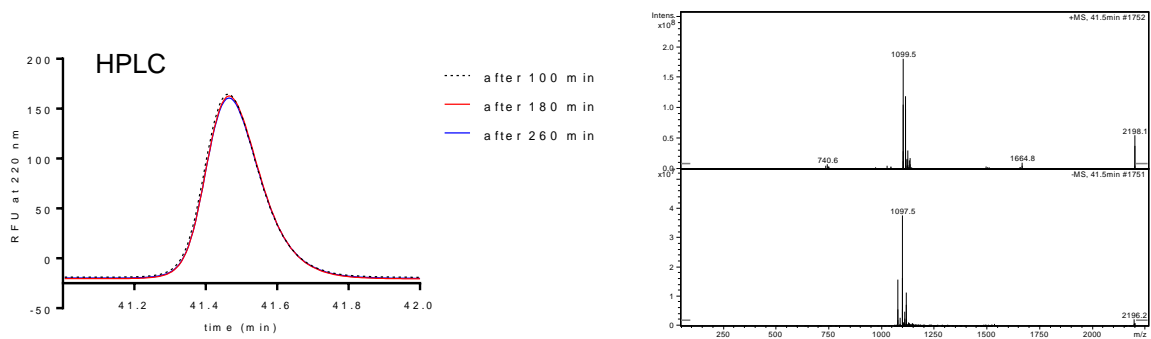

**Figure S1.** LC-MS analysis of SaClpP with 12IGF. SaClpP (1  $\mu$ M) and 12IGF (46  $\mu$ M) were incubated under *in vitro* assay conditions for up to 260 min and analyzed via HPLC. No reduction in 12IGF amounts could be observed. Identity of 12IGF (2196 kDa) was confirmed by mass spectrometry at a retention volume of 41.5 ml.

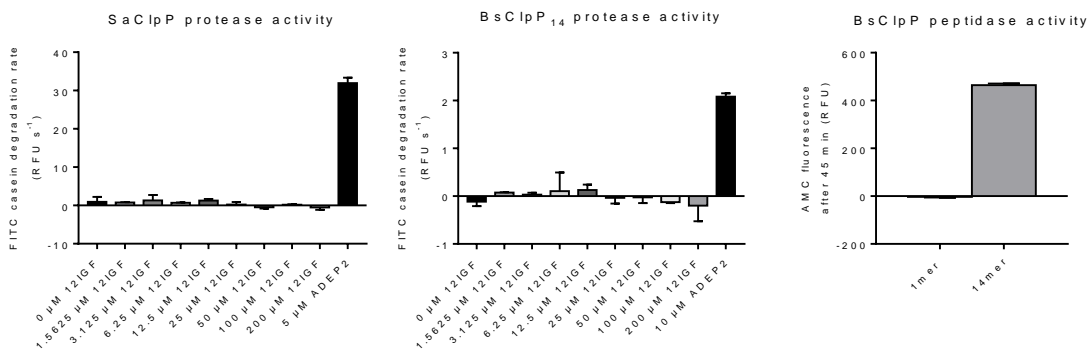

**Figure S2.** FITC-casein degradation by SaClpP and tetradecameric BsClpP (tetradecamer conditions applied as described in the main text) at different 12IGF concentrations and 5  $\mu$ M or 10  $\mu$ M ADEP2 as positive controls, respectively. No activation of casein degradation by 12IGF was detected. *Right panel*, the tetradecameric state of BsClpP was confirmed by stand-alone peptide hydrolysis (i. e. without addition of ADEP2 or 12IGF) with a monomeric preparation as a negative control.

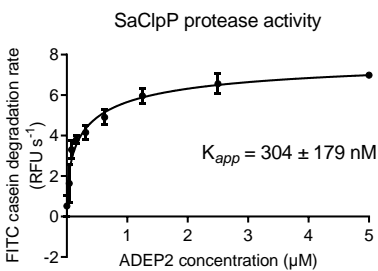

**Figure S3.** FITC-casein degradation by 100 nM of SaClpP at different ADEP2 concentrations.
